# Supplementary material
Source: HighWire-hosted journal article supplement (https://injuryprevention.bmj.com/content/24/6/451)
Supplement: inline-supplementary-material-1 [file inline-supplementary-material-1.pdf]

**Supplementary table 1.** Published studies investigating drowning-related morbidity, mortality and risk factors in India

| # | Study                 | Study period | Place             | Age group  | Sample size                             | Study design and methods                                          | Outcome measure                                                                                                 | Relevant results                                                                                                                                                                                                                                                                                                                                                                                               | Comments on study quality (based on STROBE Statement)                                                                                                                                                                                                                                                                                      |
|---|-----------------------|--------------|-------------------|------------|-----------------------------------------|-------------------------------------------------------------------|-----------------------------------------------------------------------------------------------------------------|----------------------------------------------------------------------------------------------------------------------------------------------------------------------------------------------------------------------------------------------------------------------------------------------------------------------------------------------------------------------------------------------------------------|--------------------------------------------------------------------------------------------------------------------------------------------------------------------------------------------------------------------------------------------------------------------------------------------------------------------------------------------|
| 1 | Bose A et al., 2006   | 1998-2004    | Vellore, India    | All ages   | 426                                     | Retrospective analysis of data from an injury surveillance system | Analysis of mortality data from an injury surveillance system                                                   | Unintentional drowning caused 87 (20%) deaths over the study period.                                                                                                                                                                                                                                                                                                                                           | (+) Data reviewed from a 7-year period.<br>(+) Data from the surveillance system is regarded as high quality and is routinely validated                                                                                                                                                                                                    |
| 2 | Debata et al., 2014   | 2010-2011    | Northern India    | 1-19 years | 434                                     | Retrospective analysis of autopsy records                         | Analysis of post-mortem data for all injury types                                                               | Two cases of drowning deaths were reported, both within the 1-5 years age group.                                                                                                                                                                                                                                                                                                                               | (+) Mortality data presented by age and sex<br>(-) Data collected from one site<br>(-) Although a retrospective study, records were only reviewed from a 1 year period                                                                                                                                                                     |
| 3 | Isaac et al., 2007    | ?            | Tamil Nadu, India | ?          | 5 discussions with 6-8 people per group | Focus group discussions in community settings                     | Discussions held with health aides, extension workers, balwadi teachers, PTCHWs and land owners/village leaders | Most groups felt that drowning was not a major cause of death in children in their area. The common sites where the groups considered that children drown in the study area were: cement pots storing water in the back yards of their homes; large buckets of water; open irrigation wells; irrigation tanks; abandoned quarries filled with rain water; small drainage pits and tanks collecting rain water. | (+) Diverse range of study participants<br>(-) Little information provided about qualitative research methods used – either for data collection or for analysis<br>(-) Participant selection process not defined<br>(-) Unclear whether data saturation was reached                                                                        |
| 4 | Jagnoor J et al, 2011 | 2001 - 2005  | India             | 0-5 years  | 777                                     | Verbal autopsy                                                    | VA conducted through in-person household interviews with family members/ caretakers                             | Drowning caused more than 26,000 deaths in children aged less than 5 years across India in 2005. A peak in drowning deaths occurred within the 1-2 year age group. Deaths were 3 times higher in rural areas than urban areas and were more common among boys than girls. Most deaths occurred in the Northeast region, where drowning accounted for 82% of all unintentional injury deaths in children.       | (+) Data subset analysed was part of a larger, nationally-representative, well-regarded study (Million Death Study)<br>(-) Data was collected by interviewing family members/caretakers of the deceased – potential for response bias<br>(-) VA are known to misclassify some causes deaths, particularly in neonates and older age groups |

|   |                         |              |                    |            |                            |                                                      |                                                                                     |                                                                                                                                                                                                                                                                                                                                                                                                                                                        |                                                                                                                                                                                                                                                                                                                                            |
|---|-------------------------|--------------|--------------------|------------|----------------------------|------------------------------------------------------|-------------------------------------------------------------------------------------|--------------------------------------------------------------------------------------------------------------------------------------------------------------------------------------------------------------------------------------------------------------------------------------------------------------------------------------------------------------------------------------------------------------------------------------------------------|--------------------------------------------------------------------------------------------------------------------------------------------------------------------------------------------------------------------------------------------------------------------------------------------------------------------------------------------|
| 5 | Jagnoor et al., 2012    | 2001–2003    | India              | All ages   | 2,003                      | Verbal autopsy                                       | VA conducted through in-person household interviews with family members/ caretakers | Drowning was the cause of 73,000 deaths, accounting for 11% of all injury-related deaths in India. This made it the third leading cause of unintentional injury mortality in the country. Rates were higher in males (8.2) than in females (4.6). The study showed drowning mortality to be grossly under-reported by the National Crime Registration Bureau (NCRB):<br>Drowning rate from study: 6.4<br>Rate from WHO/GBD: 6.3<br>Rate from NCRB: 2.1 | (+) Data subset analysed was part of a larger, nationally-representative, well-regarded study (Million Death Study)<br>(-) Data was collected by interviewing family members/caretakers of the deceased – potential for response bias<br>(-) VA are known to misclassify some causes deaths, particularly in neonates and older age groups |
| 6 | Kalaiselvan et al, 2011 | Oct-Nov 2009 | Pondicherry, India | All ages   | 1,613 household's surveyed | Population-based cross-sectional study               | Retrospective injury data collected in-person using a structured interview guide    | 14 drowning injuries were reported in total, corresponding to 0.2% of all injuries. Drowning was investigated by age group: 4 (0.2%) drowning cases were for people aged under 18, 8 (0.1%) among people aged 18-60 years and 2 (0.3%) for people aged 60+ years. 4 females and 10 males drowned.                                                                                                                                                      | (+) Social mapping was used to identify study villages<br>(+) Standardised and tested data collection tools were used<br>(+) High participation rate (97%)<br>(-) Retrospective reports from a one year period – potential for recall bias                                                                                                 |
| 7 | Kanchan et al., 2007    | 1993-2003    | Manipal, India     | All ages   | 58                         | Retrospective analysis of medical records            | Analysis of medical record data from one site, specifically for drowning            | 85% of drowning cases were males, 0-20 year olds accounted for 59% of cases, 69% of cases occurred in fresh water. 55% of cases experienced respiratory problems, 21% experienced neurological problems and 15% had no complications. 12% of cases died in hospital, with a survival period ranging from 2-18 days.                                                                                                                                    | (+) Provides morbidity data<br>(+) Provides data on health outcomes following drowning<br>(-) Small a number of cases despite long review period<br>(-) Data collected from one hospital site only<br>(-) Old data                                                                                                                         |
| 8 | Kanchan T et al, 2009.  | 1994-2007    | Manipal, India     | 0-10 years | 75                         | Retrospective analysis of autopsy and police records | Analysis of autopsy records and police records for all injury deaths                | Drowning accounted for 11% of fatal child injury cases. Drowning mortality was more common among boys than girls (3:1), the average age of drowning mortality was 5.4 years. Drowning fatalities were concentrated among toddlers (indoor settings) and school age children (outdoor settings).                                                                                                                                                        | (+) Detailed data provided on the mechanism and circumstance of each injury death<br>(-) Small sample size from a long study period: the 75 deaths analysed corresponded to only 3% of total autopsy cases over the study period                                                                                                           |

|    |                        |                     |                       |             |                          |                                                                    |                                                                             |                                                                                                                                                                                                                                                                                                                                                                                                                                                                                                            |                                                                                                                                                                                                                                                                             |
|----|------------------------|---------------------|-----------------------|-------------|--------------------------|--------------------------------------------------------------------|-----------------------------------------------------------------------------|------------------------------------------------------------------------------------------------------------------------------------------------------------------------------------------------------------------------------------------------------------------------------------------------------------------------------------------------------------------------------------------------------------------------------------------------------------------------------------------------------------|-----------------------------------------------------------------------------------------------------------------------------------------------------------------------------------------------------------------------------------------------------------------------------|
| 9  | Kumar et al., 2013     | 2000-2010           | All India – coastline | All ages    | ?                        | Retrospective analysis of media reports and a range of police data | Review and follow-up of media reports and drowning data from police reports | 78% of coastal drownings were due to rip currents, 5% were suicides, 5% were boat accidents, 10% were accidents within the harbor and 2% were unknown. Rip currents caused drowning deaths of 350 people in Andhra Pradesh and 293 in Visakhapatnam over the study period. The east coast of India averaged 30–40 drownings, and west coast of India averaged 5–10 drownings per year during the study period.                                                                                             | (+) Long study period<br>(+) Multiple data sources reviewed<br>(+) Clearly defined inclusion criteria for drowning cases and method of drowning<br>(+) Study limitations and potential sources of bias clearly outlined<br>(-) Data sources used are known to be unreliable |
| 10 | Mirkazemi et al., 2009 | 2007-2008           | Pune, India           | All ages    | 2100 households surveyed | Population-based cross-sectional study                             | Semi-structured interviews with household heads                             | Unprotected water surfaces close to living areas were reported by 33% of HHs. 21% of HHs associated drowning risk with a lack of lifeguard or safety devices at swimming places, and 25% associated risk to swimming without being trained to swim. There was no association between socioeconomic status and presence of unprotected water surfaces close to living areas. 4% of the upper socioeconomic strata had not received formal swim training, compared to 42% of the lower socioeconomic strata. | (+) Large sample size<br>(+) Households were randomly selected through multistage, stratified, cluster random sampling<br>(+) Risk factors for drowning were investigated, not just burden                                                                                  |
| 11 | Padubidri et al., 2013 | Jan 2009 – Dec 2011 | Mangalore, India      | 12-49 years | 328                      | Retrospective analysis of medico-legal autopsies                   | Analysis of autopsy data for women to determine cause and manner of death   | Drowning accounted for 18 (5%) deaths in the study cohort.                                                                                                                                                                                                                                                                                                                                                                                                                                                 | (-) Data collected from one site<br>(-) Few deaths related to drowning in the cohort<br>(-) Methods of identifying drowning-related suicide not outlined                                                                                                                    |

|    |                     |           |                    |             |       |                                                                           |                                                                                                                              |                                                                                                                                                                                                                                                                                                                                                    |                                                                                                                                                                                                                                                                                        |
|----|---------------------|-----------|--------------------|-------------|-------|---------------------------------------------------------------------------|------------------------------------------------------------------------------------------------------------------------------|----------------------------------------------------------------------------------------------------------------------------------------------------------------------------------------------------------------------------------------------------------------------------------------------------------------------------------------------------|----------------------------------------------------------------------------------------------------------------------------------------------------------------------------------------------------------------------------------------------------------------------------------------|
| 12 | Sapna et al., 2008  | 2007      | Kerala, India      | 12-60 years | 254   | Hospital based cross-sectional survey, clinical data from medical records | Participants from an outpatient epilepsy clinic completed a survey on injuries experienced as a result of an epilepsy attack | One near-drowning event was reported by epilepsy patients surveyed. Despite this, the paper states: "drowning is probably the most common type of fatal accident in patients with epilepsy" and highlights drowning mortality is most common amongst children with epilepsy.                                                                       | <p>(+) Clear inclusion/exclusion criteria outlined</p> <p>(+) Participants recruited over a 6 month period</p> <p>(+) Two data sources reviewed: survey responses and data from medical records</p> <p>(-) Data collected from one site</p> <p>(-) Only one drowning case reported</p> |
| 13 | Sharma et al., 2009 | 2004-2005 | Jamnagar, India    | All ages    | 1,496 | Population-based cross-sectional study                                    | Self-reported, retrospective injury data collected in-person using a structured questionnaire                                | 12% of the study population reported experiencing an injury in the past year. 1 drowning case was reported out of 178 injury cases. It was for a girl aged between 0-4 years.                                                                                                                                                                      | <p>(+) In-depth data provided on sampling methods</p> <p>(-) Data collected from one location only</p> <p>(-) 1 year look-back period introduces potential for recall bias</p> <p>(-) Minimal data provided on data collection tool</p>                                                |
| 14 | Shetty et al., 2007 | 1994–2005 | Taluk, South India | All ages    | 984   | Retrospective analysis of medical records                                 | Analysis of medical record data from 4 different sources, specifically for drowning                                          | 78% of drowning deaths were males and 22% were females. Overall, drowning rates decreased over the study period, yet there was a sharp increase in male drowning deaths from 2002-2005. The majority of drowning deaths occurred in the 21-30 year age group (26%). The majority of cases occurred in wells/ponds (44%), followed by rivers (30%). | <p>(+) Long study period</p> <p>(+) Multiple data sources reviewed</p> <p>(+) Detailed information surrounding the context of drowning events is provided</p> <p>(-) Medical records reviewed for only one town – generalisability of results?</p>                                     |
| 15 | Singh et al., 2011  | 1999-2001 | Moradabad, India   | 25-64 years | 2,222 | Verbal autopsy and review of medical records                              | VA conducted through in-person household interviews with family members and local health workers. Clinical data reviewed     | Drowning accounted for 2% of all deaths.                                                                                                                                                                                                                                                                                                           | <p>(+) Large sample</p> <p>(+) Both VA results and data from medical records analysed</p> <p>(+) Standardised WHO tool used for VA</p> <p>(-) Medical records only reviewed by one physician</p>                                                                                       |

|    |                        |      |                      |             |       |                                                   |                                                                                                                  |                                                        |                                                                                                                                                                     |
|----|------------------------|------|----------------------|-------------|-------|---------------------------------------------------|------------------------------------------------------------------------------------------------------------------|--------------------------------------------------------|---------------------------------------------------------------------------------------------------------------------------------------------------------------------|
| 16 | Stalin et al.,<br>2015 | 2013 | Tamil Nadu,<br>India | All<br>ages | 3,947 | Population-<br>based cross-<br>sectional<br>study | Self-reported,<br>retrospective<br>injury data<br>collected in-<br>person using a<br>structured<br>questionnaire | There no cases of drowning<br>during the study period. | (-) No details<br>provided on sampling<br>methods<br>(-) Self-reported retrospective<br>data collected - potential for<br>recall bias<br>(+) Large study population |
|----|------------------------|------|----------------------|-------------|-------|---------------------------------------------------|------------------------------------------------------------------------------------------------------------------|--------------------------------------------------------|---------------------------------------------------------------------------------------------------------------------------------------------------------------------|
